# Supplementary material for: Assay-ready Cryopreserved Cell Monolayers Enabled by Macromolecular Cryoprotectants
Source: PubMed Central journal article supplement (PMC9472225; doi:10.1021/acs.biomac.2c00791), 2022-08-16
Supplement: bm2c00791_si_001.pdf [file bm2c00791_si_001.pdf]

## Electronic Supporting Information

### **Assay-Ready Cryopreserved Cell Monolayers Enabled by Macromolecular Cryoprotectants**

Ruben M. F. Tomás,<sup>a</sup> Akalabya Bissoyi,<sup>a</sup> Thomas R. Congdon,<sup>c</sup> and Matthew I. Gibson<sup>a,b\*</sup>

<sup>a</sup> *Division of Biomedical Sciences, Warwick Medical School, University of Warwick, Gibbet Hill  
Road, Coventry, CV4 7AL, UK;*

<sup>b</sup> *Department of Chemistry, University of Warwick, Gibbet Hill Road, Coventry, CV4 7AL, UK;*

<sup>c</sup> *Cryologyx Ltd, 71-75 Shelton Street, London, UK, WC2H 9JQ, UK*

\*Corresponding Author [m.i.gibson@warwick.ac.uk](mailto:m.i.gibson@warwick.ac.uk)

# 1 Additional Data

## 1.1 Polymer Characterisation

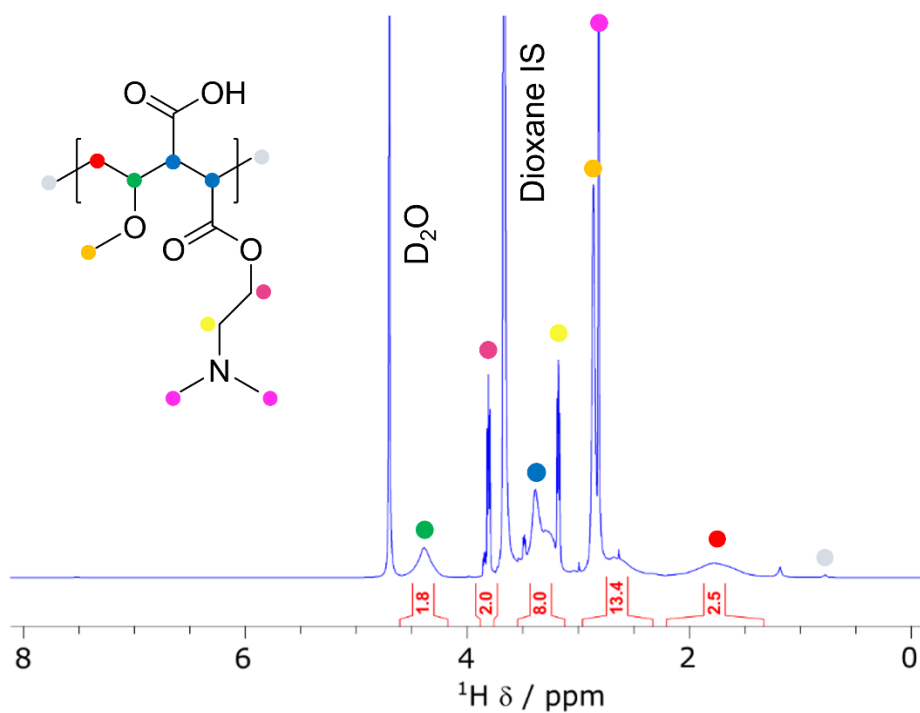

**Figure S1.**  $^1\text{H}$  NMR characterisation of polyampholyte. IS = internal standard.

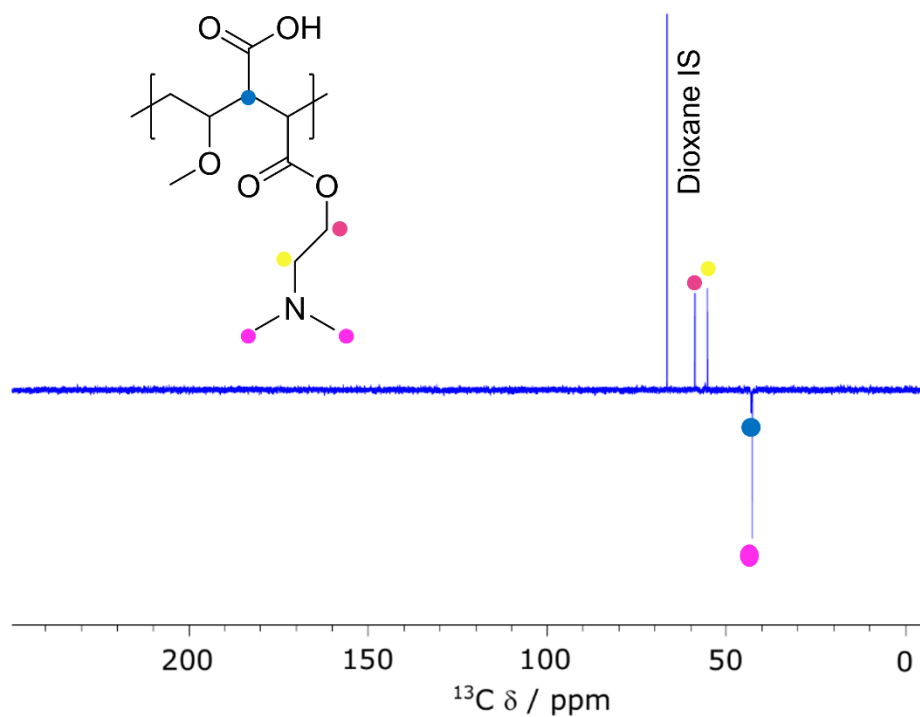

**Figure S2.**  $^{13}\text{C}$  NMR characterisation of polyampholyte. IS = internal standard.

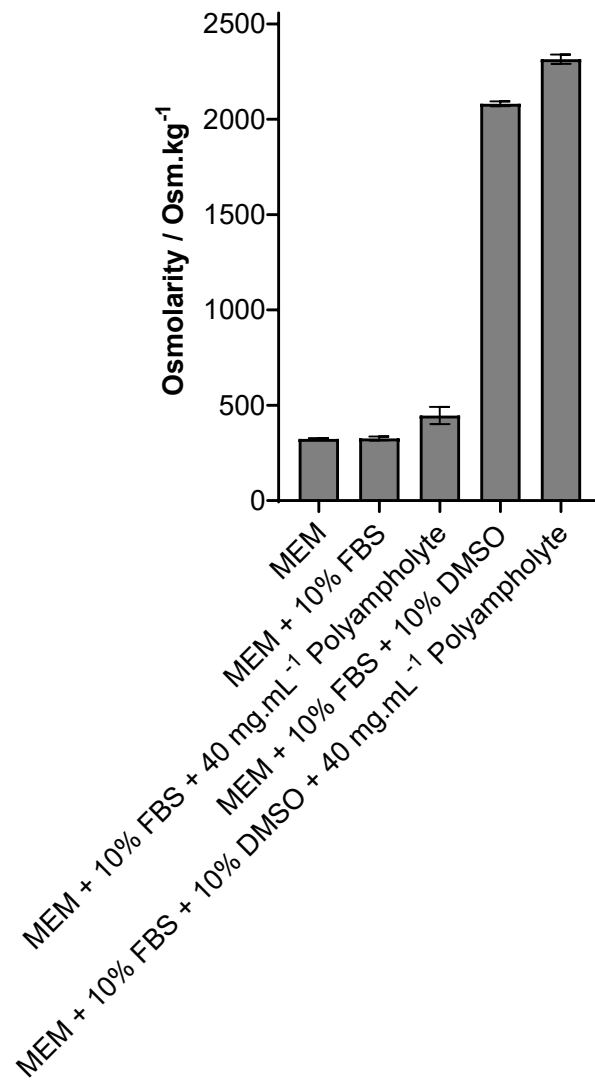

**Figure S3.** Osmolarity measurements of Minimum Essential Medium Eagle supplemented with 10%v/v FBS, 10 %v/v DMSO and/or polyampholyte (40 mg.mL<sup>-1</sup>).

## 1.2 Cell Recovery Data

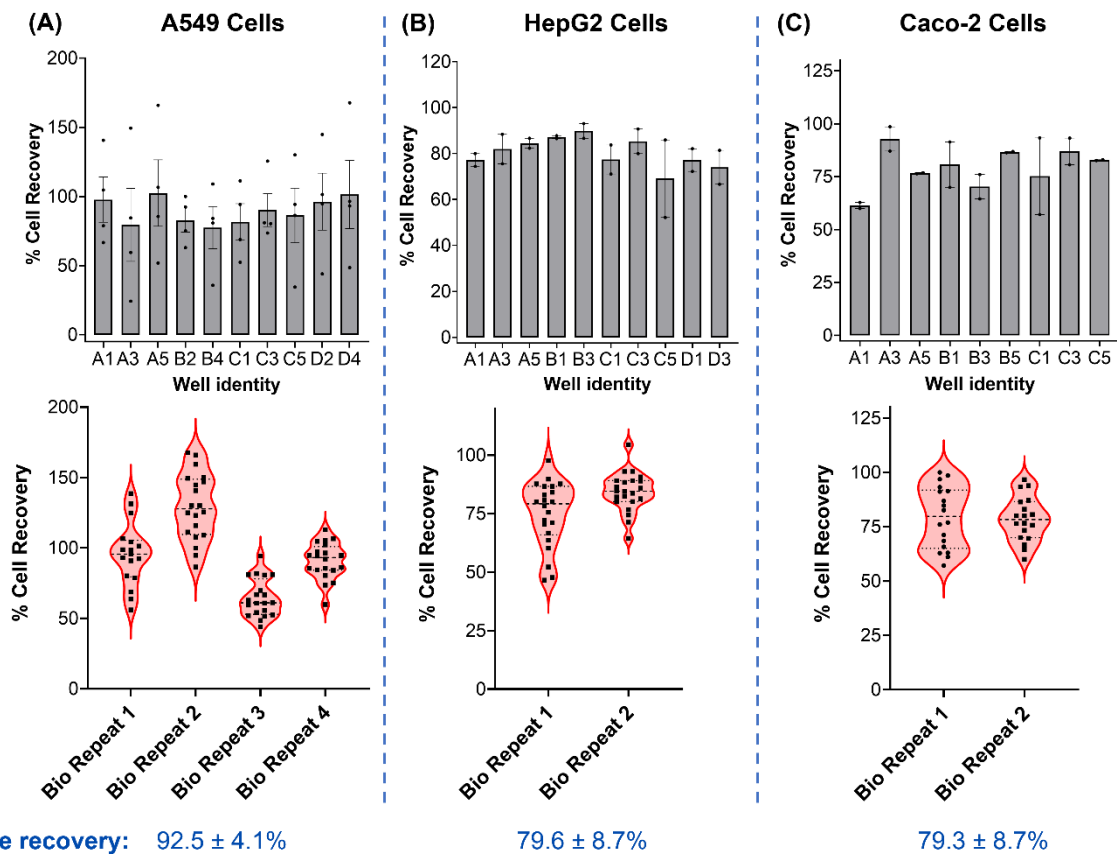

**Figure S4.** Post-thaw cell recovery of (A) A549, (B) HepG2 and (C) Caco-2 confluent monolayers cryopreserved with  $40 \text{ mg}\cdot\text{mL}^{-1}$  of polyampholyte and 10 %v/v DMSO. Cell counts were completed 24 h post-thaw. Graphs have been plotted as bar graphs and violin plots to show average cell recoveries and well-to-well variability. Data is presented as mean % cell recovery  $\pm$  SEM from two independent repeats.

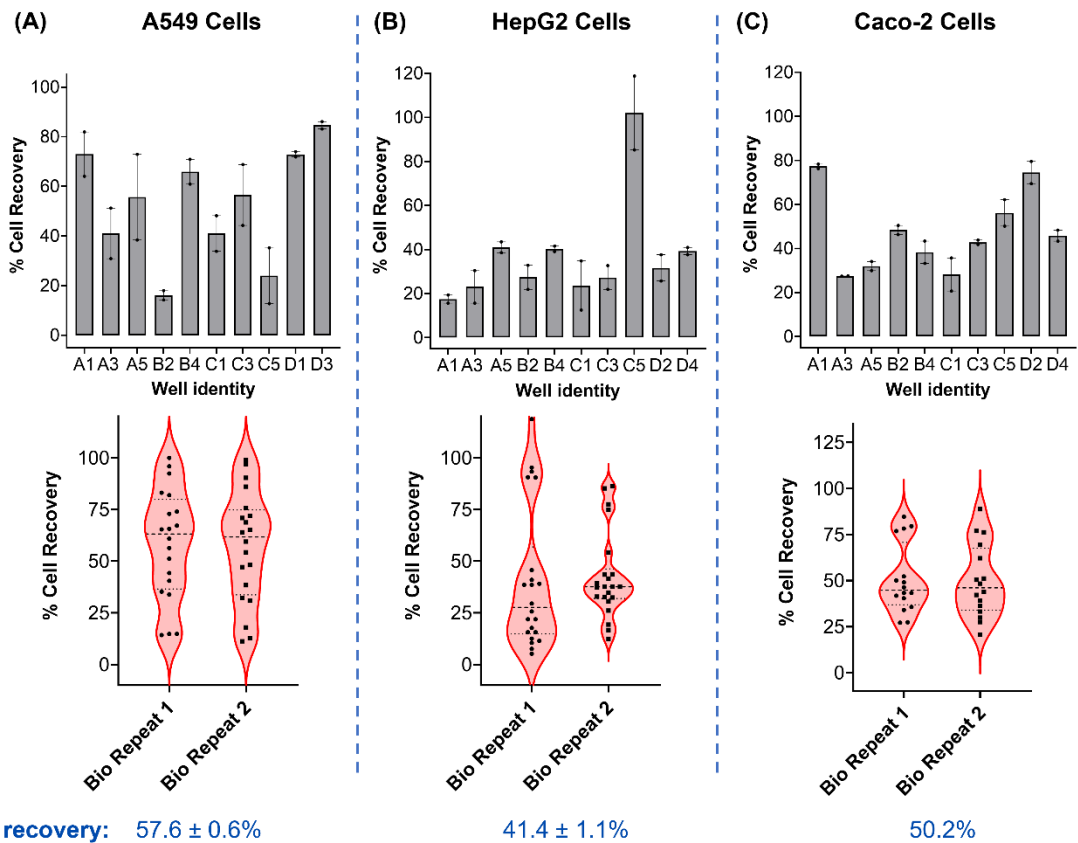

**Figure S5.** Post-thaw cell recovery of (A) A549, (B) HepG2 and (C) Caco-2 confluent monolayers cryopreserved with 10 %v/v DMSO. Cell counts were completed 24 h post-thaw. Graphs have been plotted as bar graphs and violin plots to show average cell recoveries and well-to-well variability. Data is presented as mean % cell recovery ± SEM from two independent repeats.

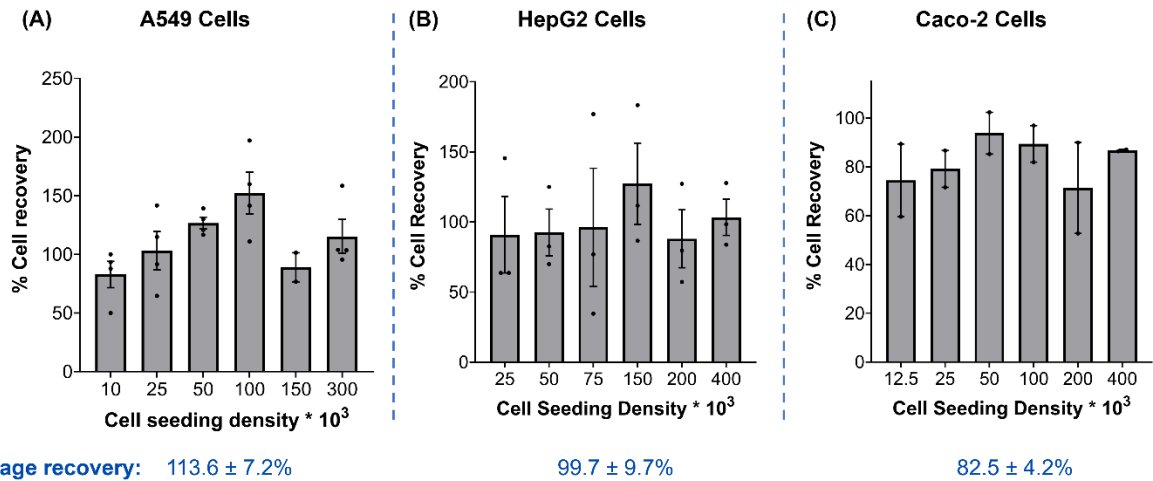

**Figure S6.** Percentage cell recovery of (A) A549, (B) HepG2 and (C) Caco-2 cells plated at different cell densities frozen with 40 mg.mL<sup>-1</sup> of polyampholyte and 10% DMSO. Cell counts were completed 24 h post-thaw. Data is presented as mean % cell recovery ± SEM from two to four independent repeats.

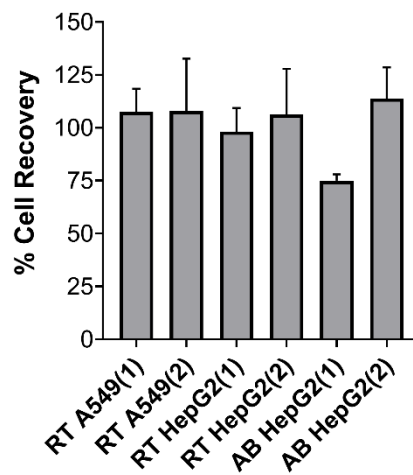

**Av. recovery:** A549 = 107.7%; HepG2 = 93.2%

**Figure S7.** Scalable freezing process. Six plates containing A549 and HepG2 cells were frozen with 40 mg.mL<sup>-1</sup> of polyampholyte and 10 %v/v DMSO by two independent scientists (Ruben Tomas, RT; Akalabya Bissoyi, AB), simultaneously, and the mean % cell recovery was determined 24 h post-thaw ± SEM of five technical repeats (different wells from the same well plate).

### 1.3 Before and after freezing imaging

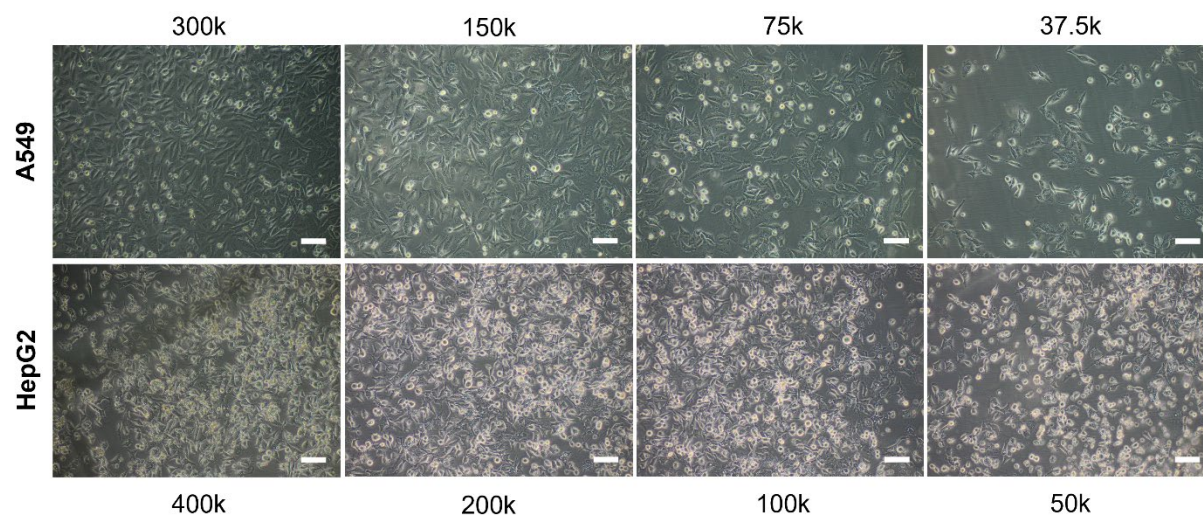

**Figure S8.** Post-thaw images of cells frozen at different cell densities. A549 and HepG2 cells were frozen with 10% DMSO and 40 mg.mL<sup>-1</sup> of polyampholyte and images were taken 24 h post-thaw. Scale bar = 100  $\mu$ m.

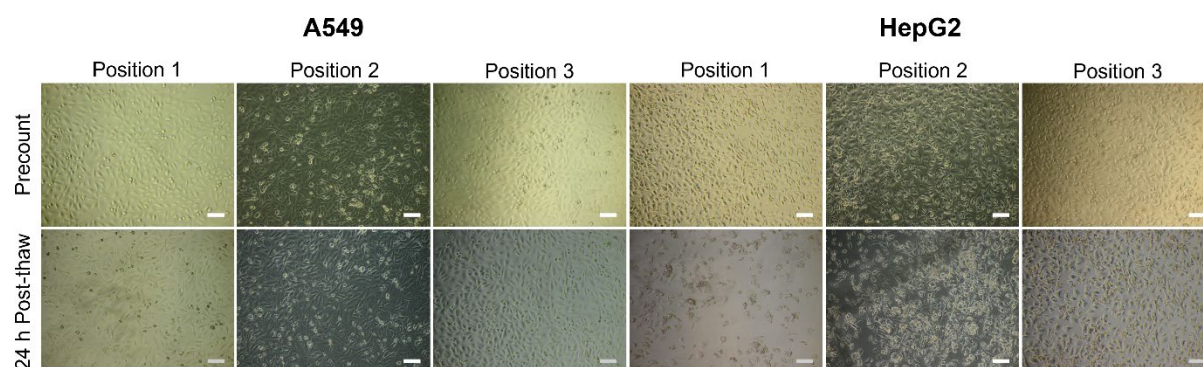

**Figure S9.** Post-thaw images of multiple positions within well plates. A549 (300k cell per well) and HepG2 (400k cell per well) cells were seeded as confluent monolayers, frozen with 10 %v/v DMSO and 40 mg.mL<sup>-1</sup> of polyampholyte and imaged 24 h post-thaw at 3 different positions. Non-frozen (precount) images have also been provided. Scale bar = 100  $\mu$ m.

## 1.4 Resazurin cell viability assay

(A) A549

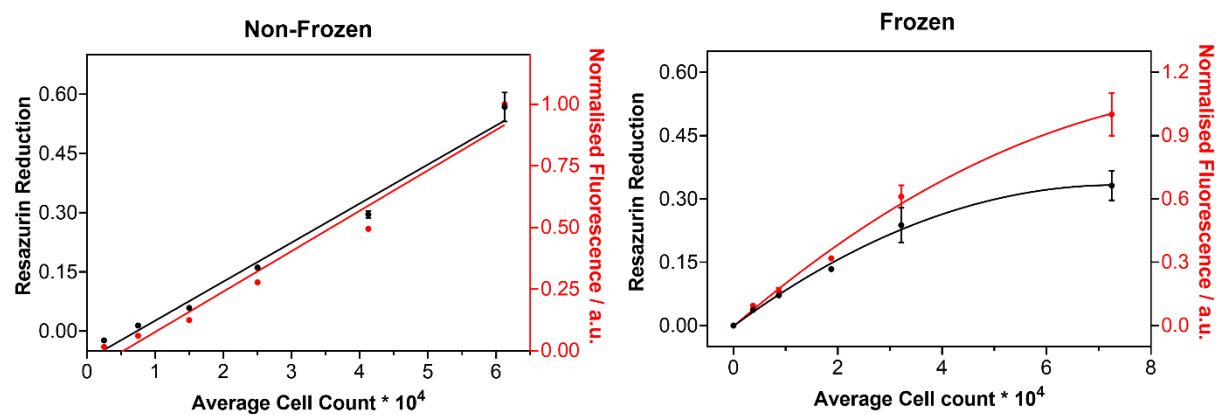

(B) HepG2

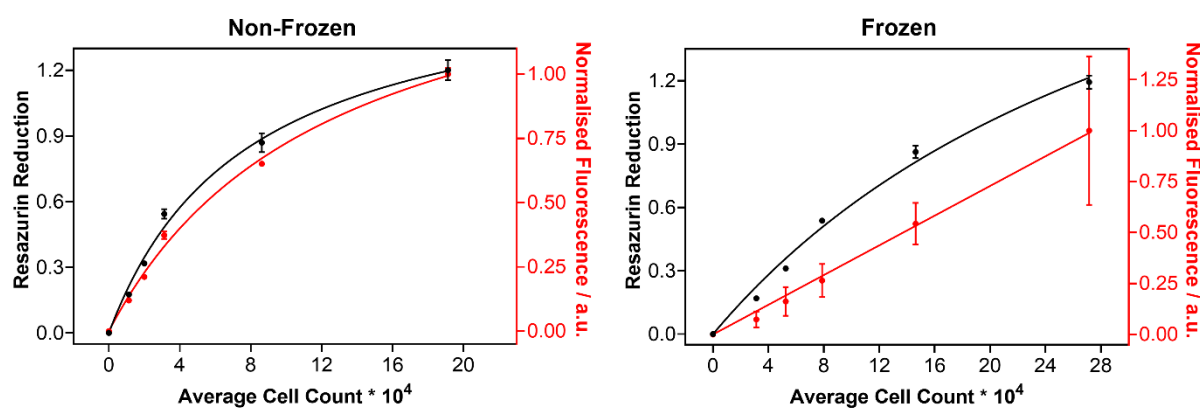

**Figure S10.** Resazurin reduction cell viability assay. Non-frozen and frozen (A) A549 and (B) HepG2 cells, seeded at multiple cell densities, were incubated with resazurin solution 24 h post-thaw and the conversion of resazurin to resorufin was measured by absorbance and fluorescence. Data is presented as both resazurin reduction and normalised fluorescence  $\pm$  SEM from two independent repeats.



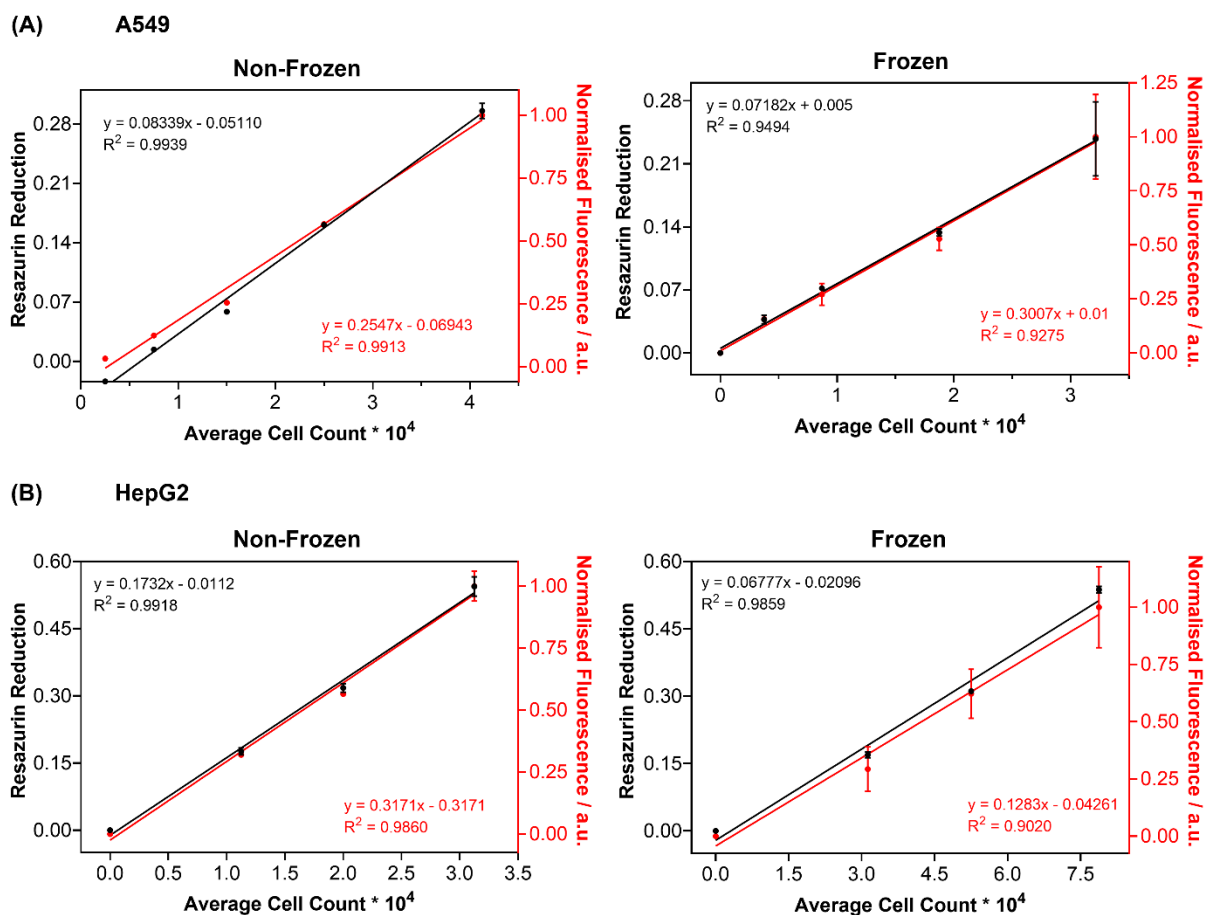

**Figure S11.** Linear dynamic working range of resazurin reduction assay. Graphs from Fig. S10 were replotted to illustrate the linear working range for % cell viability measurements in drug screening applications. Data is presented as both resazurin reduction and normalised fluorescence  $\pm$  SEM from two independent repeats.

## 1.12 Imaging intracellular ice growth

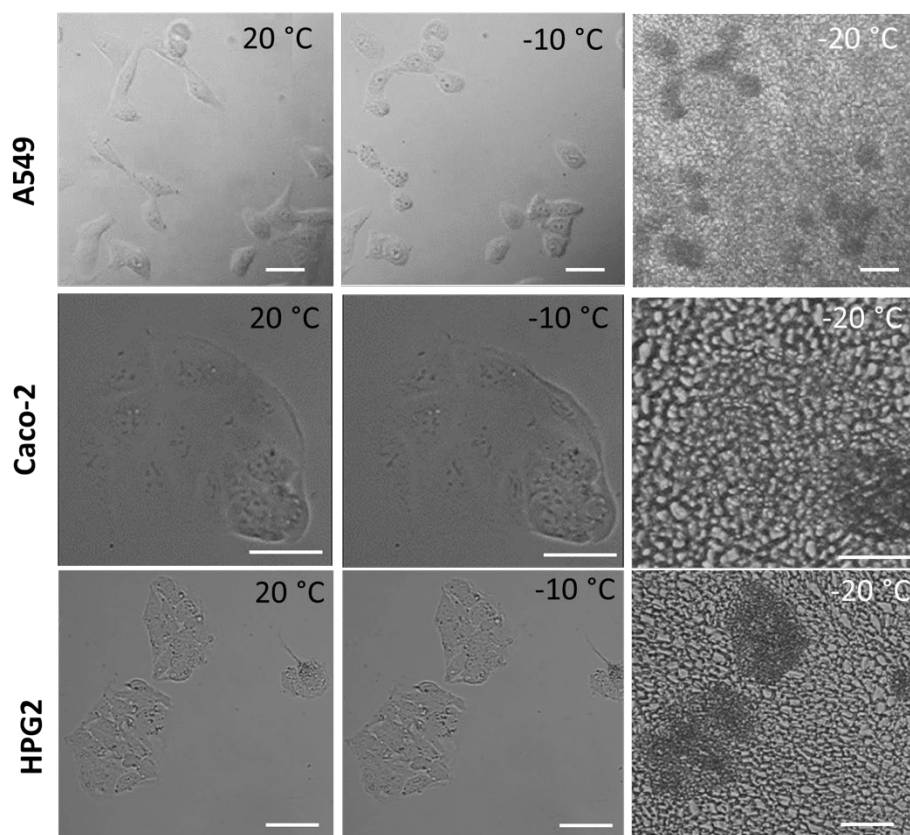

**Figure S12.** Cryomicroscopy images. A549, HepG2 and Caco-2 cells were frozen on a cryostage in the presence of 10 %v/v DMSO and 40 mg.mL<sup>-1</sup> of polyampholyte to visualise intracellular ice growth. Images were taken at RT (20 °C), -10 °C and -20 °C. Scale bar = 100 μm.

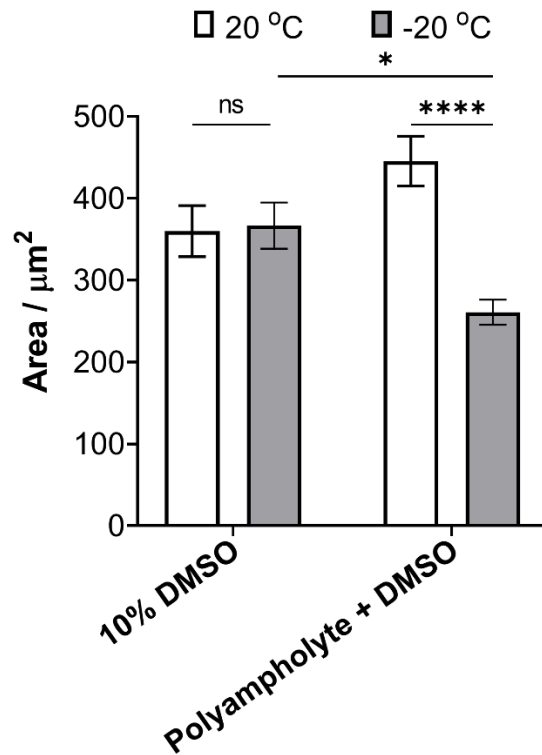

**Figure S13.** Cellular dehydration during freezing. A549 cells were imaged using cryomicroscopy at 20 °C and -20 °C in media containing either 10 %v/v DMSO (white bar) or 10 %v/v DMSO and 40 mg.mL<sup>-1</sup> of polyampholyte (dark grey bar) to quantify cell shrinkage (by area) using ImageJ. The data is presented as mean area ± SEM of at least 37 cells imaged (ANOVA, Tukey PostHoc; ns:  $p > 0.05$ , \*  $p \leq 0.05$ , \*\*\*\*  $p \leq 0.0001$ ).

## 1.6 Caspase-3/-7 assay

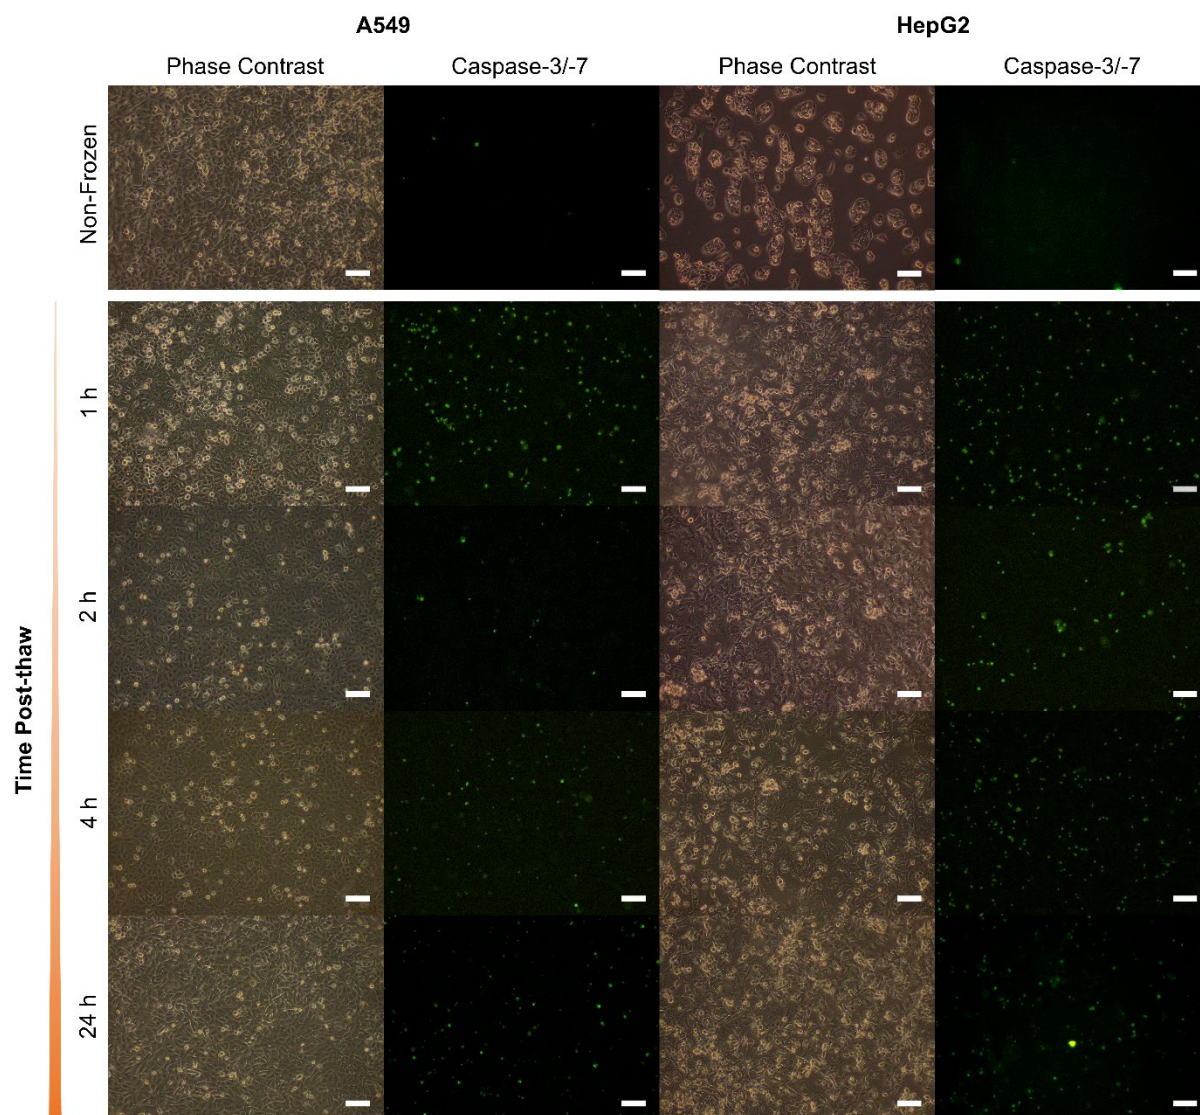

**Figure S14.** Imaging caspase-3/-7 activation. A549 and HepG2 cells frozen with  $40 \text{ mg.mL}^{-1}$  of polyampholyte and 10% DMSO were thawed with cell culture media and incubated with CellEvent Caspase-3/7 Detection Reagent for real-time imaging of caspase activation over time. Representative images have been provided.

## 1.9 Cell cycle analysis

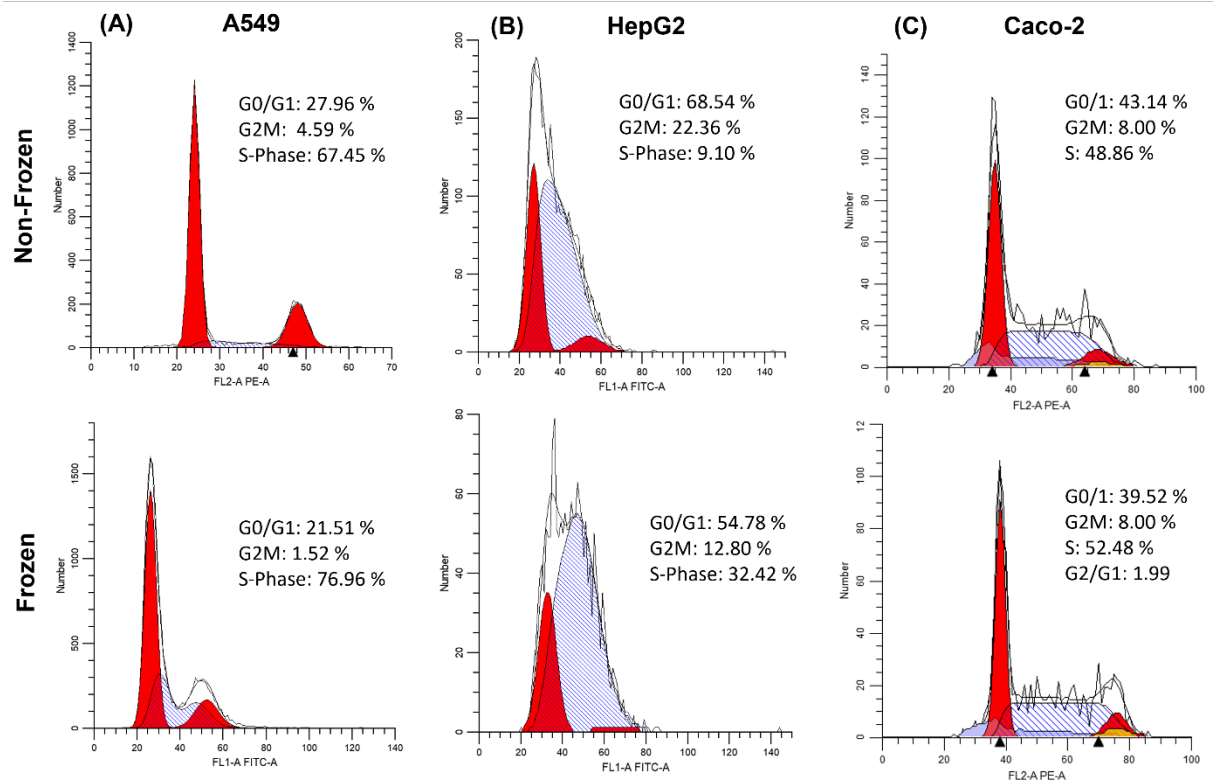

**Figure S15.** Flow cytometry cell cycle analysis of (A) A549, (B) HepG2 and (C) Caco-2 before and 24h after freezing with 10% DMSO and 40 mg.mL<sup>-1</sup> of polyampholyte.

## 1.10 CYP response

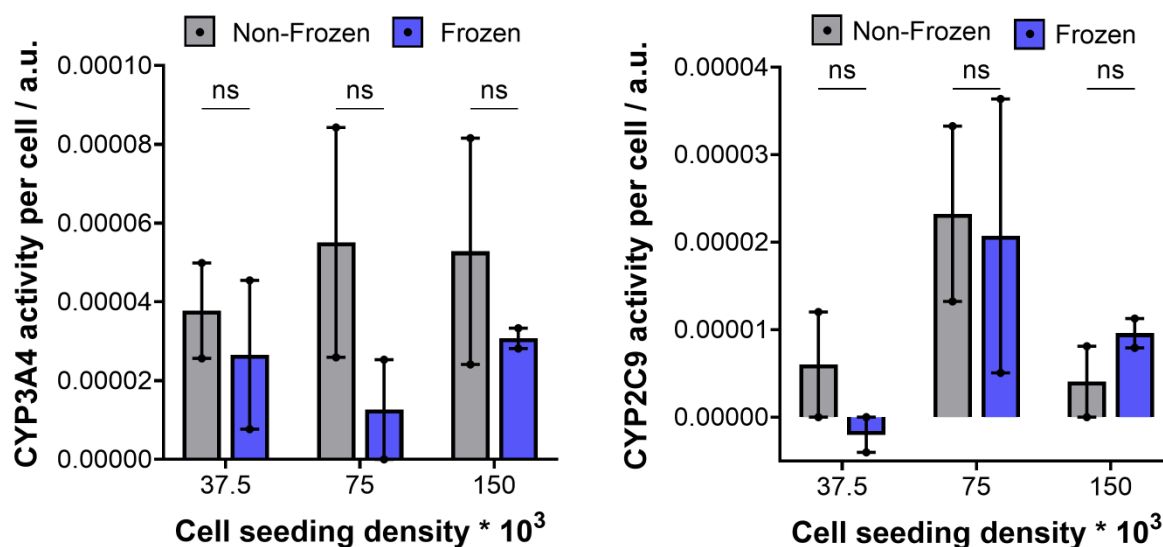

**Figure S16.** Innate cytochrome P450 (CYP) activity. The innate CYP activity of HepG2 cells was measured before and after freezing with 10% DMSO and 40 mg.mL<sup>-1</sup> of polyampholyte. Data is presented as mean CYP activity per cell ± SEM from two independent repeats (ANOVA, Tukey PostHoc; ns: p > 0.05).

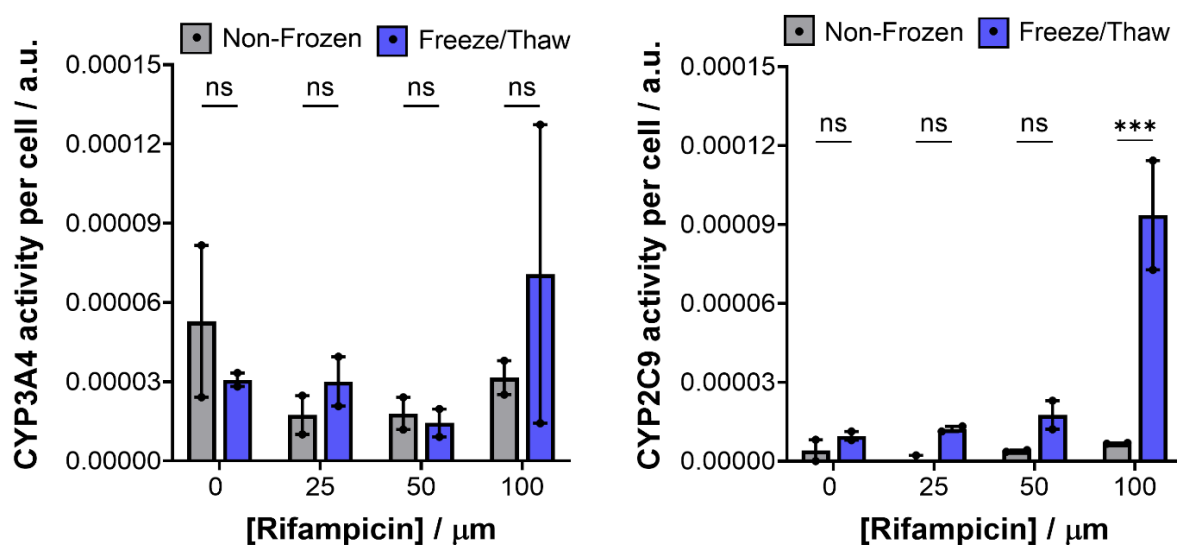

**Figure S17.** Rifampicin-induced cytochrome P450 (CYP) response. Cryopreserved confluent HepG2 cells, frozen with 10 %v/v DMSO and 40 mg.mL<sup>-1</sup> of polyampholyte, were thawed for 24 h and incubated with Rifampicin for 48 h to elevate CYP responses. Data is presented as mean CYP activity per cell ± SEM from two independent repeats (ANOVA, Tukey PostHoc; ns: p > 0.05, \*\*\* p ≤ 0.001).

## 1.11 Long term storage and transportation of frozen cells

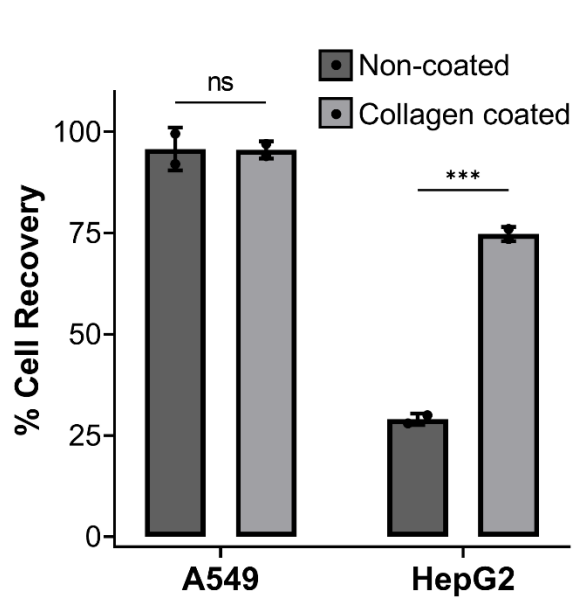

**Figure S18.** Storage in dry ice. A549 and HepG2 cells were frozen with  $40 \text{ mg.mL}^{-1}$  of polyampholyte and 10 %v/v DMSO in either collagen coated or uncoated plates. Plates were subsequently stored in polystyrene boxes containing dry ice for 5 days to determine feasibility of plates for transportation. The percentage of cells recovered were determined 24 h post-thaw and the data is presented as mean % cell recovery  $\pm$  SEM from two independent repeats (ANOVA, Tukey PostHoc; ns:  $p > 0.05$ , \*\*\*  $p \leq 0.001$ ).

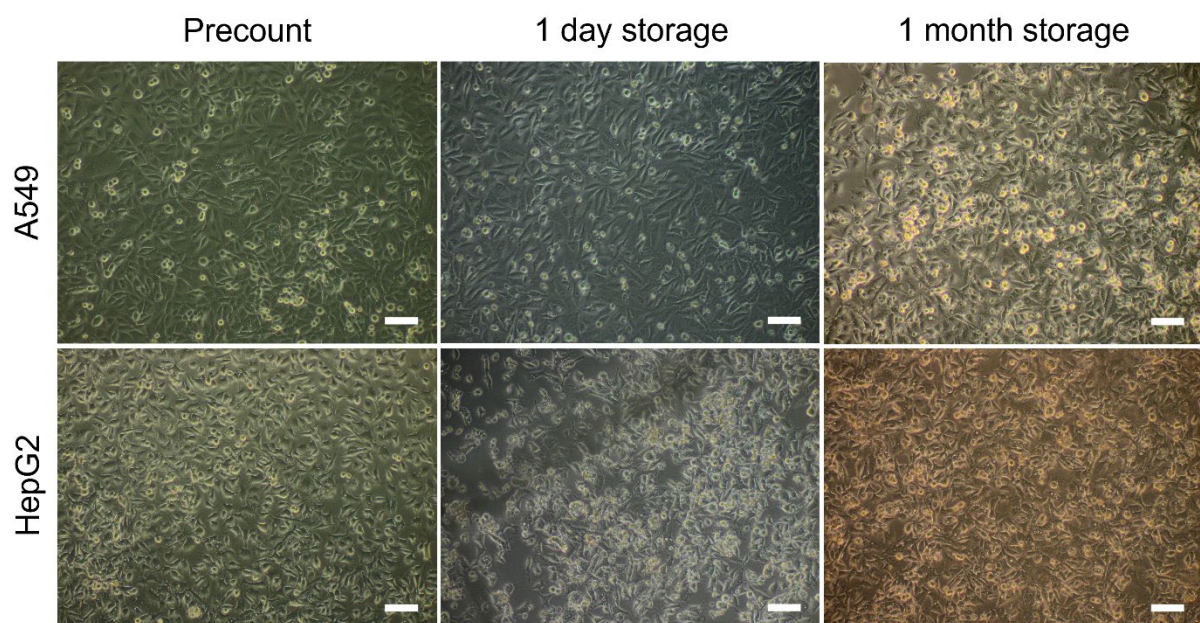

**Figure S19.** Long-term cell storage. A549 and HepG2 cells were imaged before freezing and 24 h post-thaw following storage for 1 day or 30 days in a  $-80 \text{ }^{\circ}\text{C}$  freezer. Scale bar =  $100 \text{ }\mu\text{m}$ .
